# Supplementary material
Source: Elsevier journal article supplement (https://www.sciencedirect.com/science/article/pii/S234128791500277X)
Supplement: mmc1 [file S234128791500277X:mmc1.doc]

**TABLE (supplementary material):** The table shows the results of the symptom index (SI), the symptom sensitivity index (SSI), the symptom association probability (SAP) and the binomial symptom index (BSI) for one-minute and two-minute windows. NR and NS represent the total number of reflux and symptom episodes respectively, whereas Na is the number of reflux-related symptoms. Note that SAP represents the standard deviation of the SAP when the onset of the windowing varied from 0 to the width of the window under study. Values above the threshold to consider a positive association were boldfaced. The shadowed rows represent those patients who underwent anti-reflux surgery. The values inside the highlighted boxes indicate those patients who presented positive values of the SI, the SSI and the SAP using a 2-minute window simultaneously and who were the candidate for anti-reflux surgery.

|  | | | **ONE-MINUTE WINDOW** | | | | | | **TWO-MINUTE WINDOW** | | | | | |
| --- | --- | --- | --- | --- | --- | --- | --- | --- | --- | --- | --- | --- | --- | --- |
| **Patient** | **NR** | **NS** | **SI** | **SSI** | **SAP** | **SAP** | **BSI** | **Na** | **SI** | **SSI** | **SAP** | **SAP** | **BSI** | **Na** |
| **F01** | 131 | 12 | **50.0** | 3.8 | 0.0 | 31.1 | 82.8 | 4 | **66.7** | 8.4 | 92.2 | 4.3 | 93.0 | 8 |
| **F02** | 51 | 24 | 37.5 | **17.6** | **99.0** | 2.4 | **100** | 9 | **54.2** | **23.5** | **100** | 0.8 | **100** | 12 |
| **F03** | 111 | 3 | 0.0 | 0.0 | 0.0 | 0.0 | 0.0 | 0 | 33.3 | 0.9 | 0.0 | 10.9 | 38.6 | 1 |
| **F04** | 94 | 11 | **54.5** | 6.4 | **100** | 1.34 | **99.7** | 6 | **54.5** | 8.6 | **99.9** | 3.0 | 83.7 | 5 |
| **F05** | 19 | 4 | 25.0 | 5.3 | 0.0 | 46.3 | 88.7 | 1 | **75.0** | **15.8** | **99.5** | 35.9 | **99.8** | 3 |
| **F06** | 77 | 1 | **100** | 2.6 | 94.5 | 0.1 | 89.2 | 1 | **100** | 2.6 | 88.9 | 0.2 | 79.5 | 1 |
| **F07** | 92 | 1 | **100** | 2.2 | 93.4 | 46.7 | 87.8 | 1 | **100** | 2.2 | 86.0 | 0.2 | 77.1 | 1 |
| **F08** | 174 | 10 | **55.6** | 3.4 | **96.3** | 16.6 | 82.3 | 5 | **88.9** | 6.3 | **98.6** | 2.1 | 61.8 | 7 |
| **F09** | 69 | 34 | 5.9 | 2.9 | 0.0 | 15.4 | 1.6 | 2 | 14.7 | 7.2 | 21.8 | 21.4 | 0.5 | 5 |
| **F10** | 82 | 46 | 21.8 | **12.2** | **95.4** | 6.3 | 87.9 | 2 | 39.1 | **21.9** | **99.9** | 8.0 | 83.0 | 15 |
| **F11** | 54 | 5 | 0.0 | 0.0 | 0.0 | 0.0 | 0.0 | 0 | 0.0 | 0.0 | 0.0 | 0.0 | 0.0 | 0 |
| **M01** | 76 | 25 | **60.0** | **19.7** | 84.6 | 5.2 | **100** | 15 | **80.0** | **31.6** | **100** | 0.0 | **100** | 18 |
| **M02** | 88 | 39 | 25.6 | **11.4** | 90.6 | 28.8 | 97.5 | 10 | 33.3 | **14.8** | **97.9** | 29.7 | 93.7 | 15 |
| **M03** | 93 | 21 | 23.8 | 5.4 | **96.9** | 39.8 | 89.5 | 5 | 42.9 | **12.9** | **99.4** | 10.2 | 93.8 | 9 |
| **M04** | 52 | 14 | 28.6 | 7.8 | **97.5** | 25.7 | 95.6 | 4 | 28.6 | 7.8 | 86.7 | 14.7 | 72.7 | 4 |
| **M05** | 146 | 11 | 0.0 | 0.0 | 28.7 | 0.0 | 0.0 | 0 | 0.0 | 0.0 | 77.3 | 0.0 | 0.0 | 0 |
| **M06** | 44 | 29 | 3.3 | 2.3 | 39.2 | 19.5 | 13.5 | 1 | 3.5 | 2.3 | 0.0 | 37.5 | 1.7 | 1 |
| **M07** | 71 | 3 | 0.0 | 0.0 | 0.0 | 0.0 | 0.0 | 0 | 0.0 | 0.0 | 0.0 | 0.0 | 0.0 | 0 |
| **M08** | 28 | 1 | 0.0 | 0.0 | 0.0 | 0.0 | 0.0 | 0 | 0.0 | 0.0 | 0.0 | 0.0 | 0.0 | 0 |
| **M09** | 99 | 6 | 16.7 | 1.0 | 63.7 | 0.0 | 41.1 | 1 | 16.7 | 2.0 | 50.2 | 0.0 | 16.7 | 1 |
| **M10** | 44 | 2 | **50.0** | 2.3 | 0.0 | 44.5 | 87.1 | 1 | **50.0** | 2.3 | 87.0 | 37.3 | 75.9 | 1 |
| **M11** | 50 | 5 | **60.0** | 6.0 | 82.6 | 20.9 | **99.3** | 3 | **60.0** | 6.0 | **95.4** | 2.1 | 95.9 | 3 |
| **M12** | 77 | 39 | 5.1 | 2.6 | 28.1 | 13.4 | 5.7 | 2 | 15.4 | 9.1 | 0.0 | 23.1 | 10.4 | 6 |
| **M13** | 64 | 19 | 15.8 | 4.7 | 73.6 | 31.4 | 67.7 | 3 | 21.0 | 6.2 | 56.5 | 25.5 | 63.0 | 5 |
| **M14** | 51 | 9 | 0.0 | 0.0 | 0.0 | 0.0 | 0.0 | 0.0 | 0.0 | 0.0 | 0.0 | 0.0 | 0.0 | 0 |
